# Supplementary material for: High-performance pipeline for MutMap and QTL-seq
Source: PeerJ journal article supplement (doi:10.7717/peerj.13170), 2022-03-18
Supplement: Sugihara_et.al._Suppl_fig.pdf [file Sugihara_et.al._Suppl_fig.pdf]

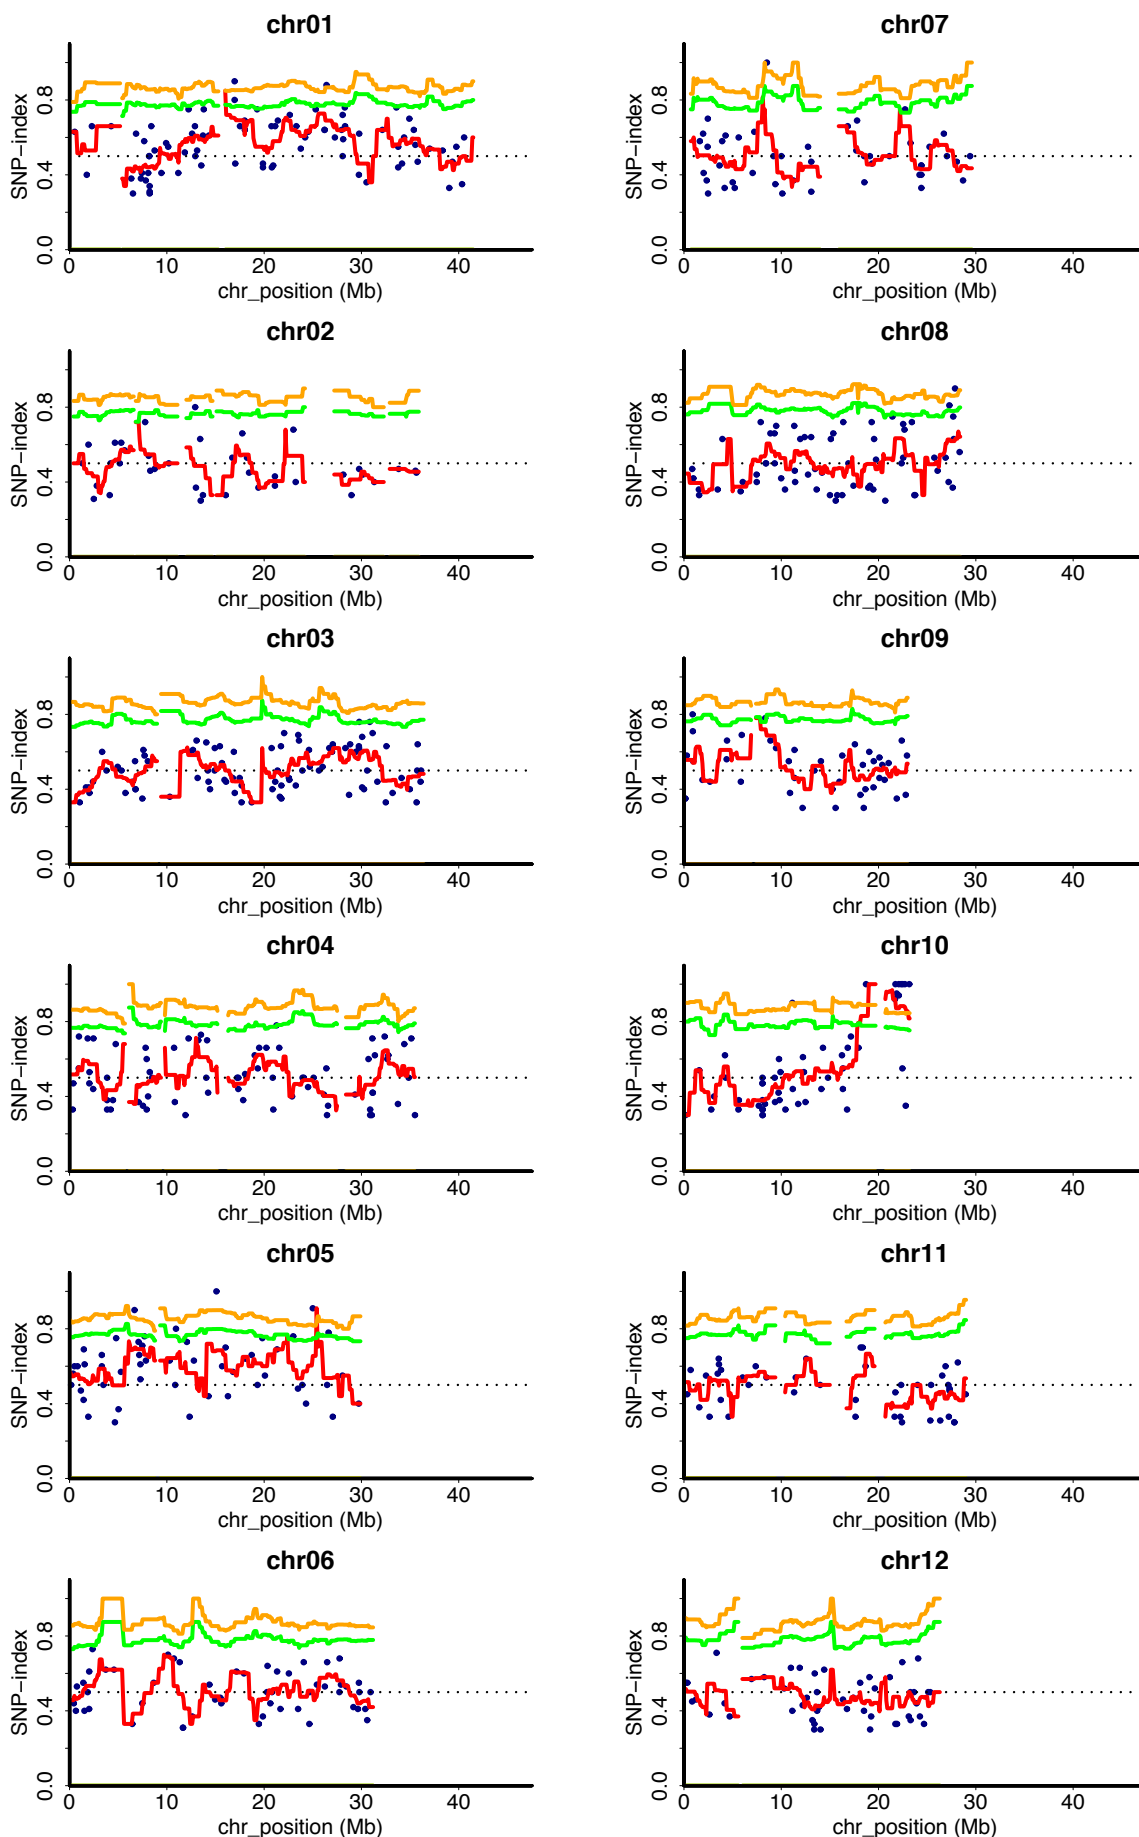

**Supplemental Figure S1 (A)** MutMap plot of Hit1917-pl from MutMap v1.4.5. Statistical confidence intervals under the null hypothesis of no QTL are shown (green:  $P < 0.05$ ; yellow:  $P < 0.01$ ).

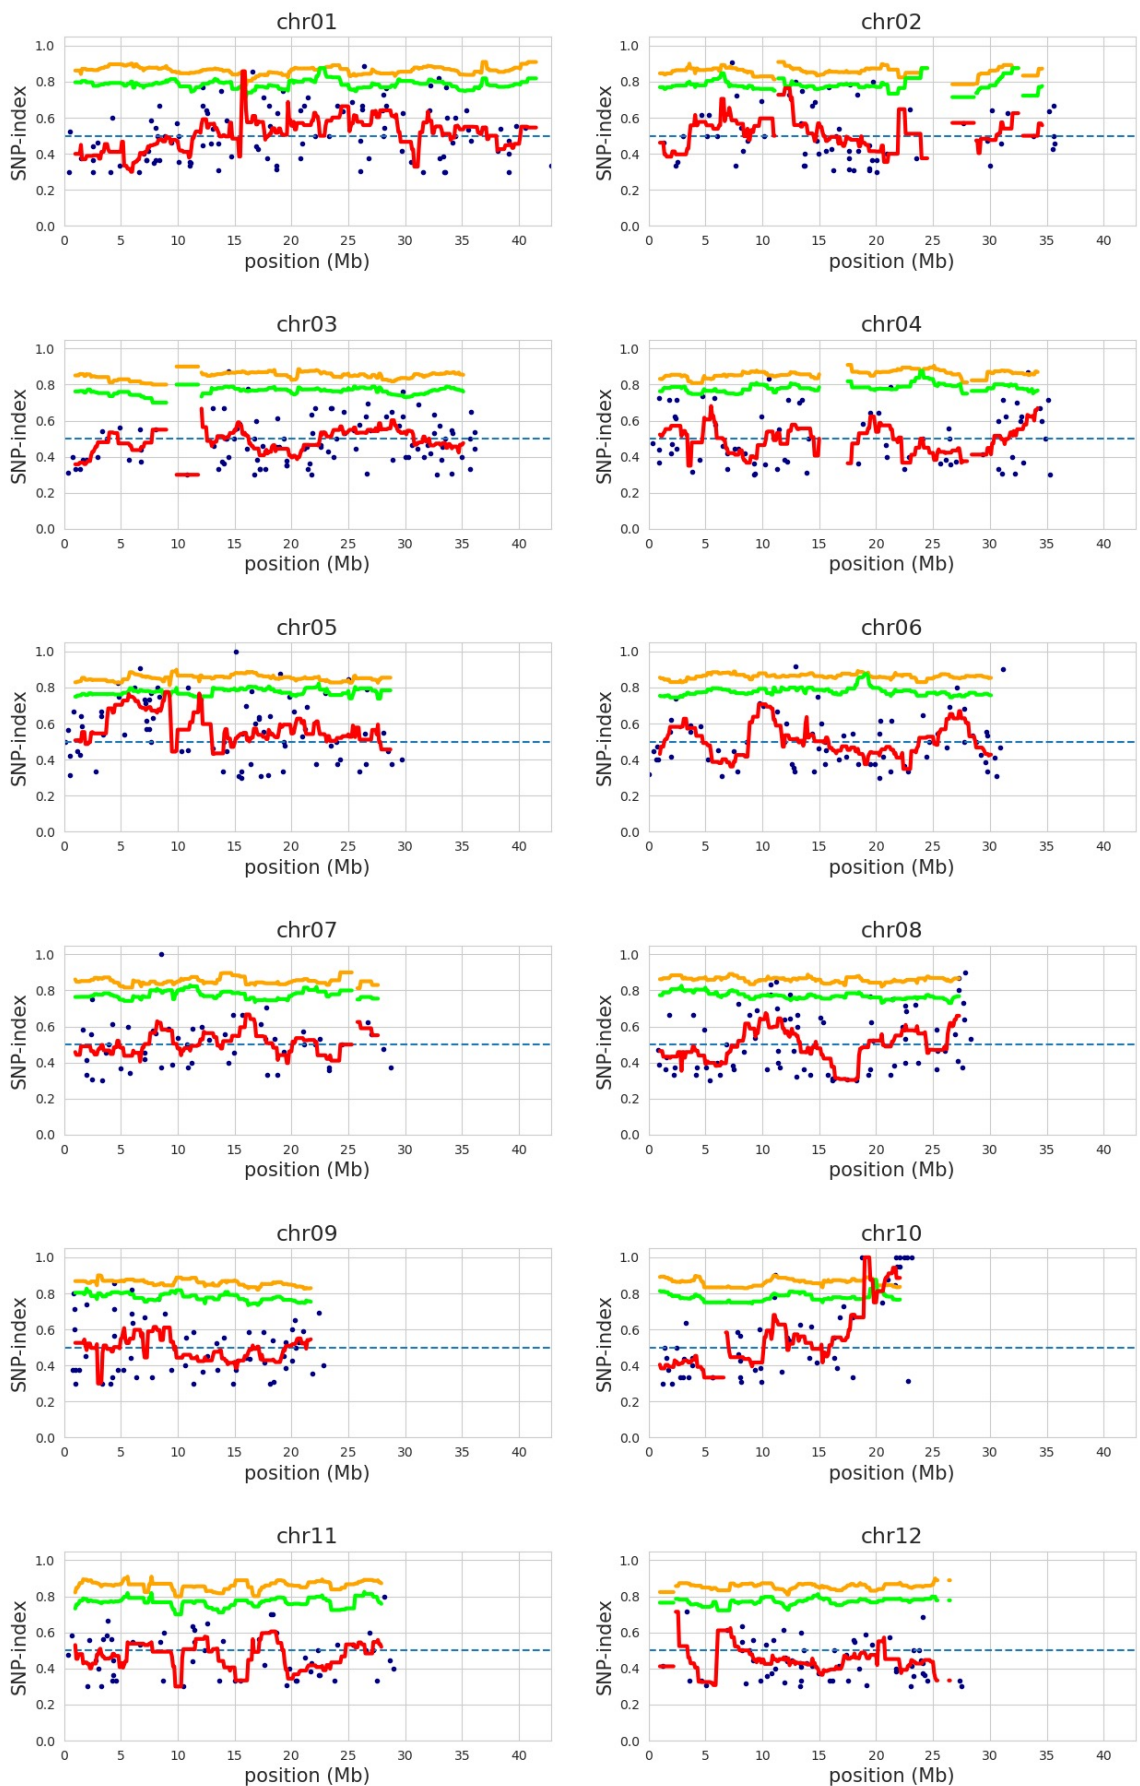

**Supplemental Figure S1 (B)** MutMap plot of Hit1917-pl from MutMap v2.3.2. Statistical confidence intervals under the null hypothesis of no QTL are shown (green:  $P < 0.05$ ; yellow:  $P < 0.01$ ).

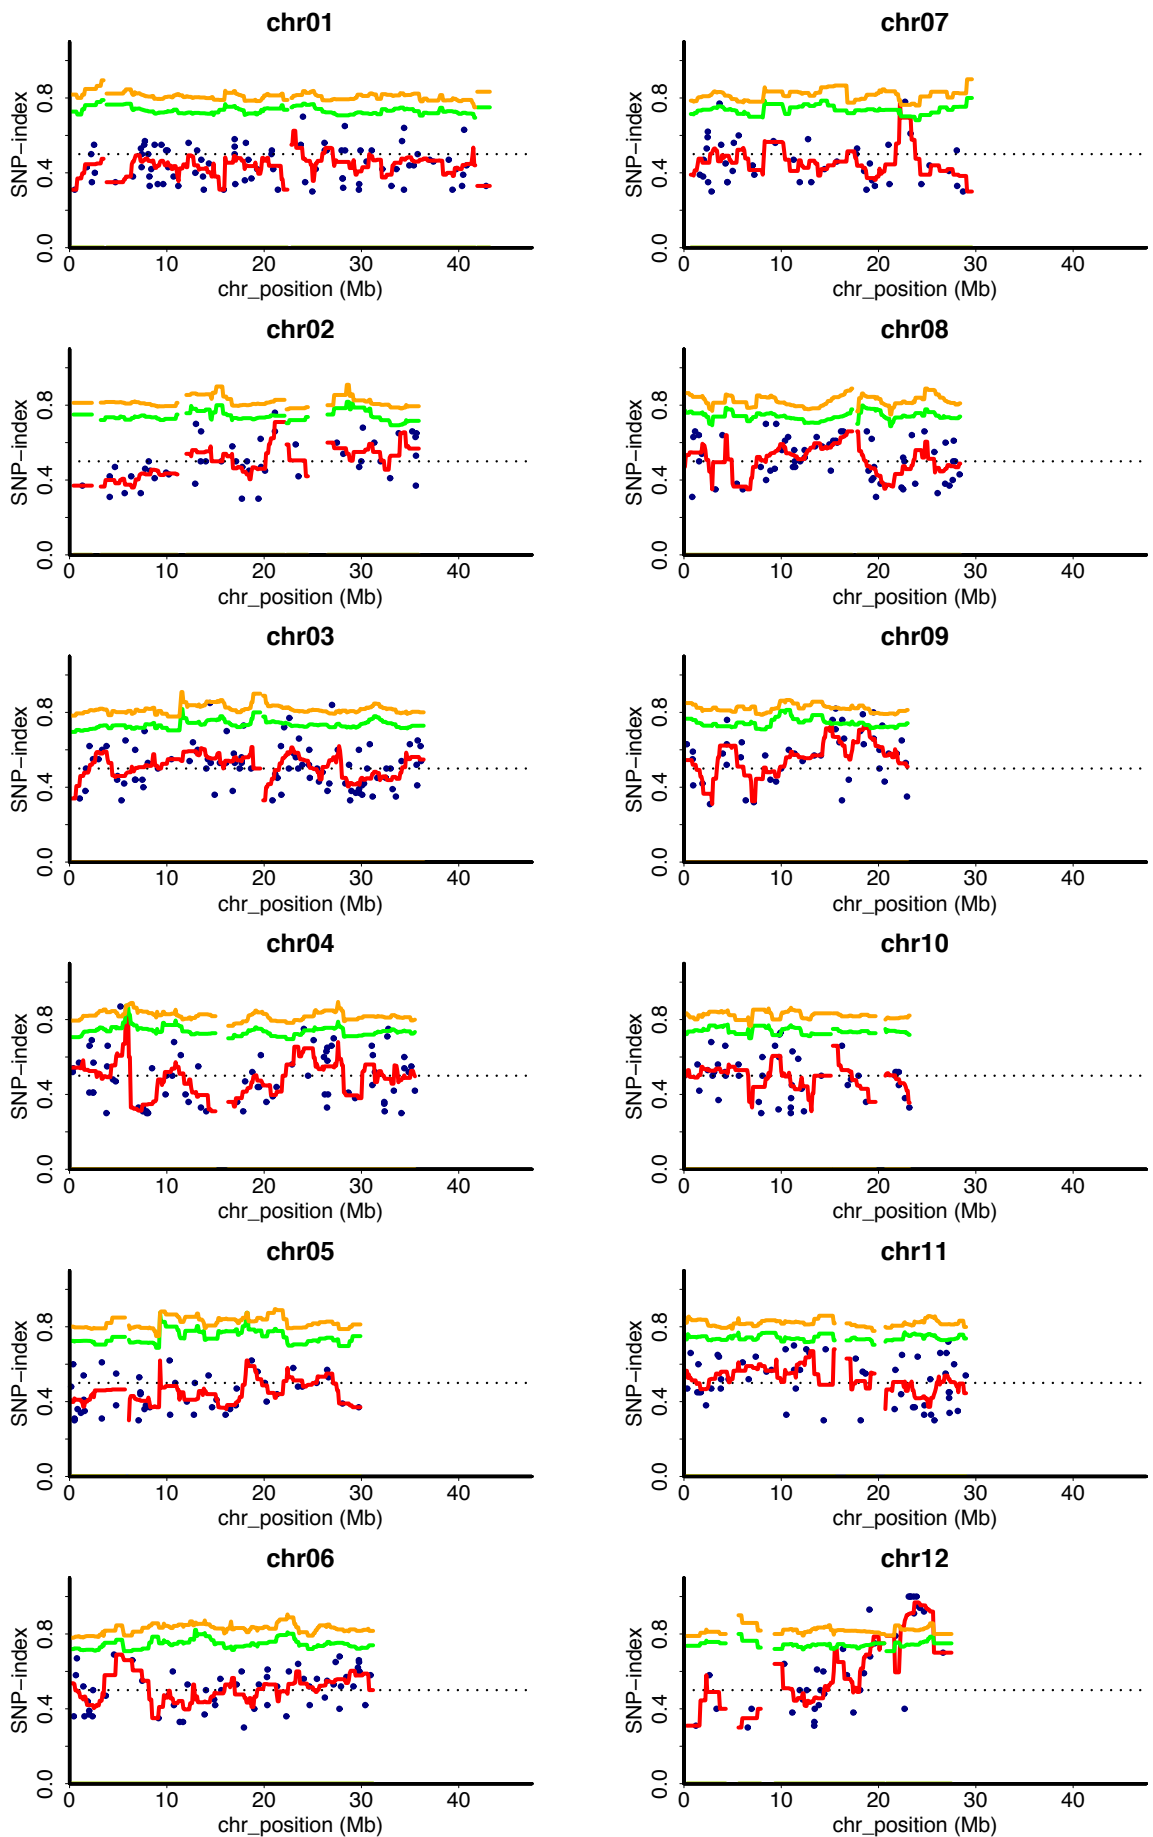

**Supplemental Figure S1 (C)** MutMap plot of Hit1917-sd from MutMap v1.4.5. Statistical confidence intervals under the null hypothesis of no QTL are shown (green:  $P < 0.05$ ; yellow:  $P < 0.01$ ).

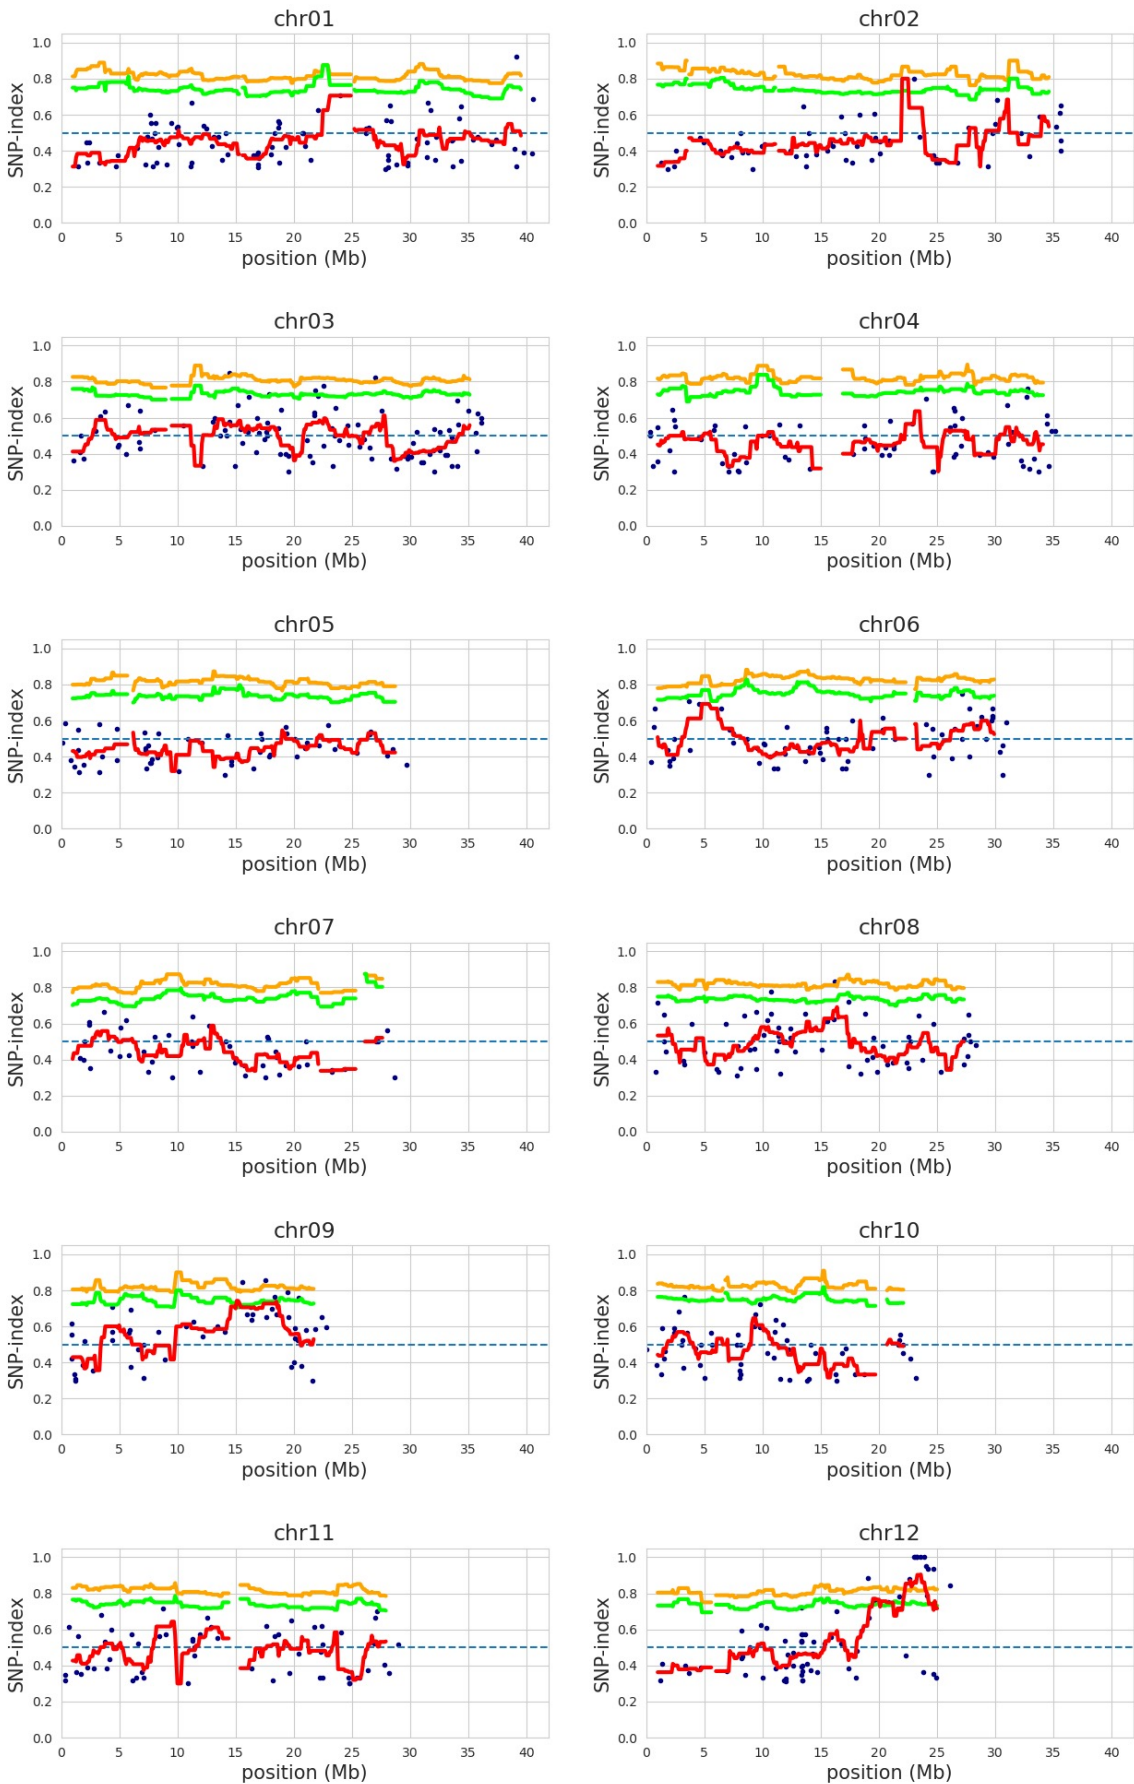

**Supplemental Figure S1 (D)** MutMap plot of Hit1917-sd from MutMap v2.3.2. Statistical confidence intervals under the null hypothesis of no QTL are shown (green:  $P < 0.05$ ; yellow:  $P < 0.01$ ).

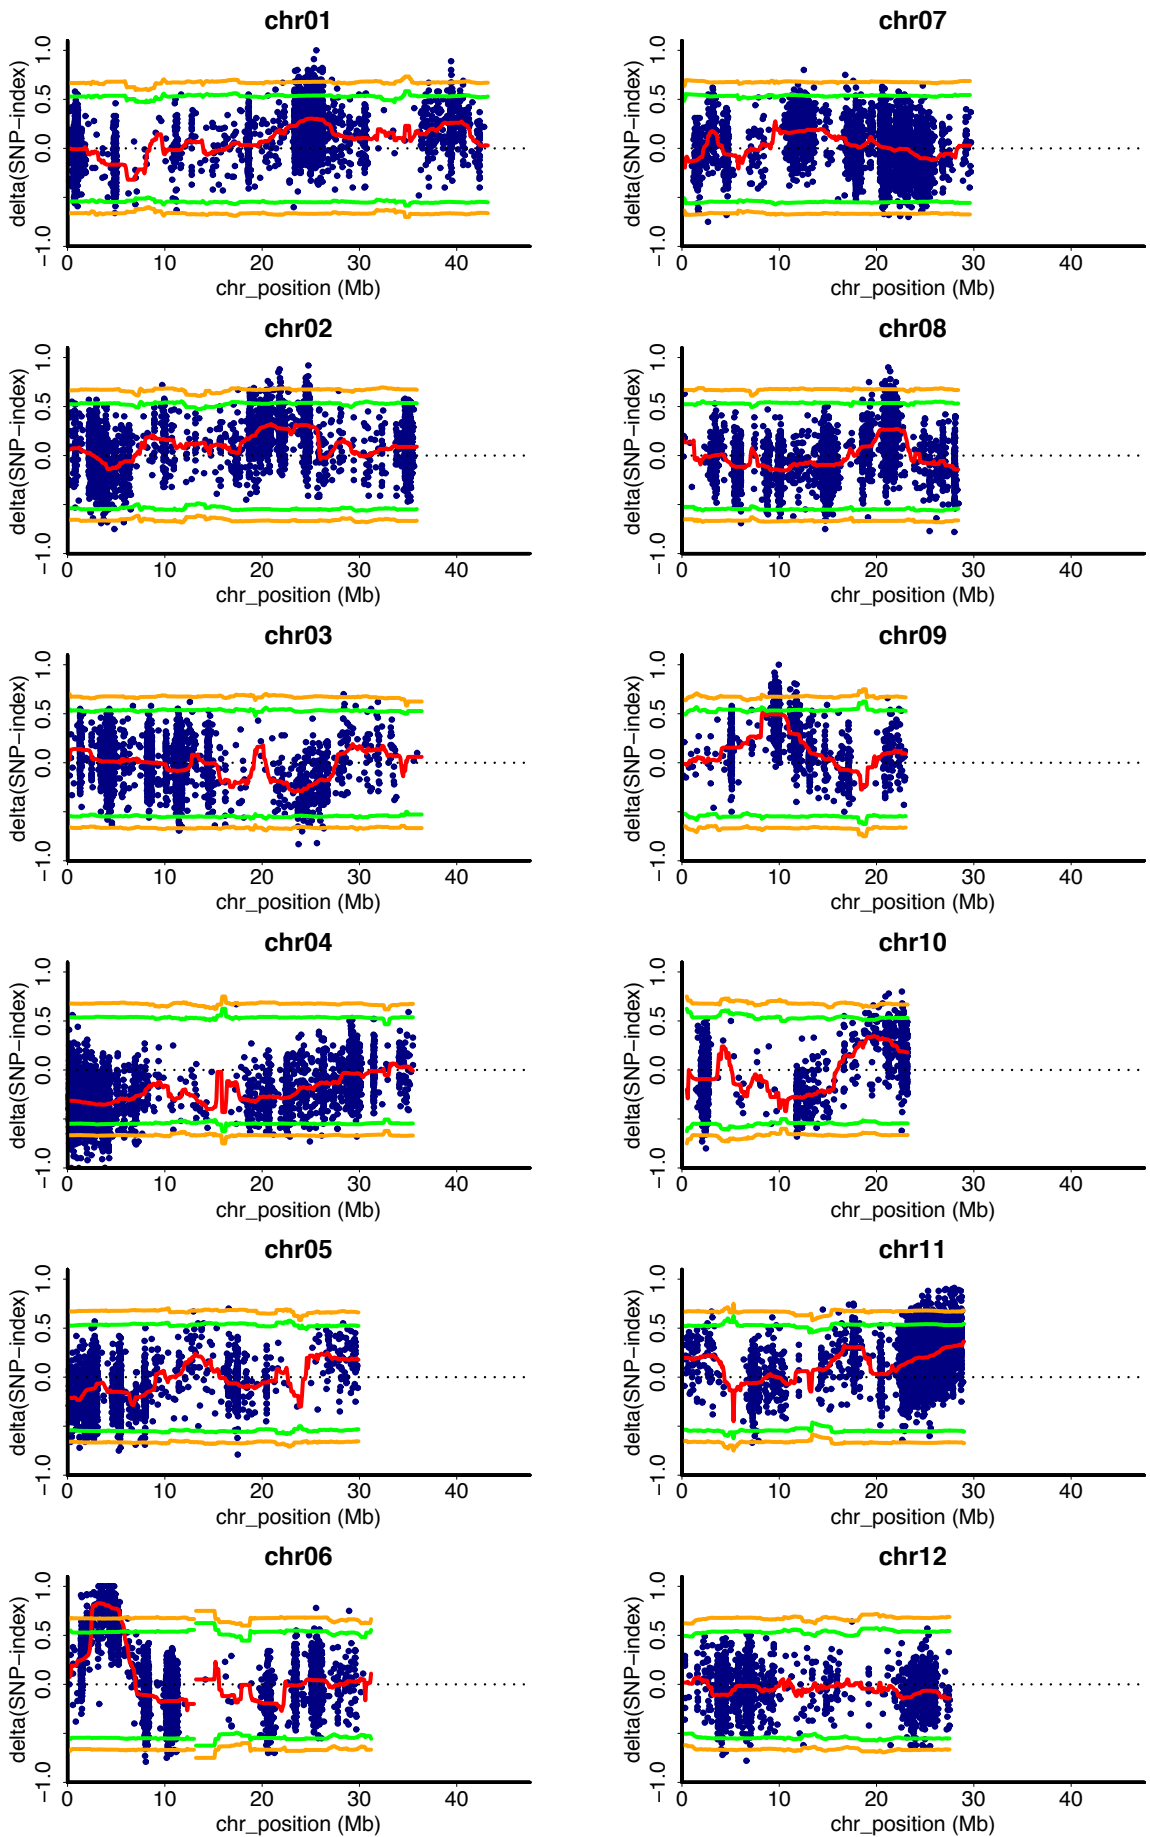

**Supplemental Figure S1 (E)** QTL-seq plot of RILs from QTL-seq v1.4.5.

The  $\Delta$ SNP-index plot obtained by subtraction of the susceptible-bulk SNP-index from the resistance-bulk SNP-index for RILs obtained from a cross between Nortai and Hitomebore. Statistical confidence intervals under the null hypothesis of no QTL are shown (green:  $P < 0.05$ ; yellow:  $P < 0.01$ ).

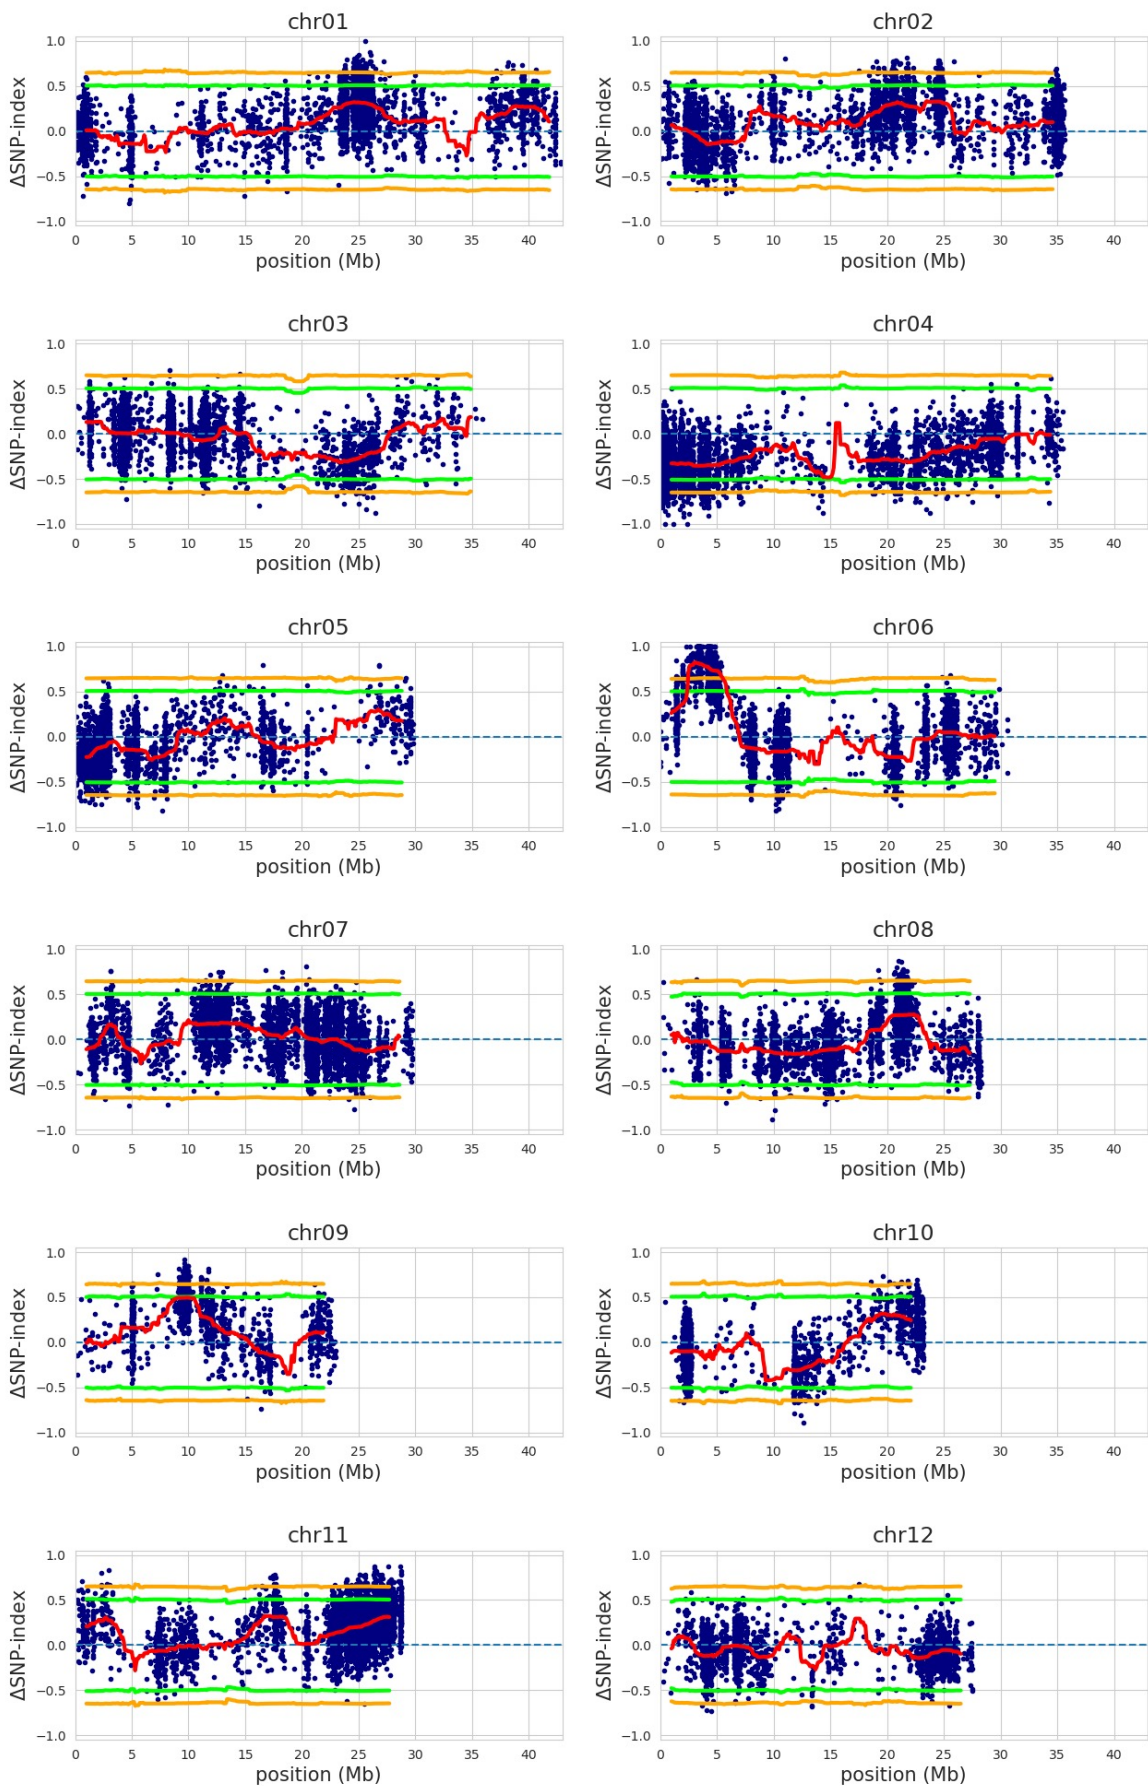

**Supplemental Figure S1 (F) QTL-seq plot of RILs from QTL-seq v2.2.2.**

The  $\Delta$ SNP-index plot obtained by subtraction of the susceptible-bulk SNP-index from the resistance-bulk SNP-index for RILs obtained from a cross between Nortai and Hitomebore. Statistical confidence intervals under the null hypothesis of no QTL are shown (green:  $P < 0.05$ ; yellow:  $P < 0.01$ ).

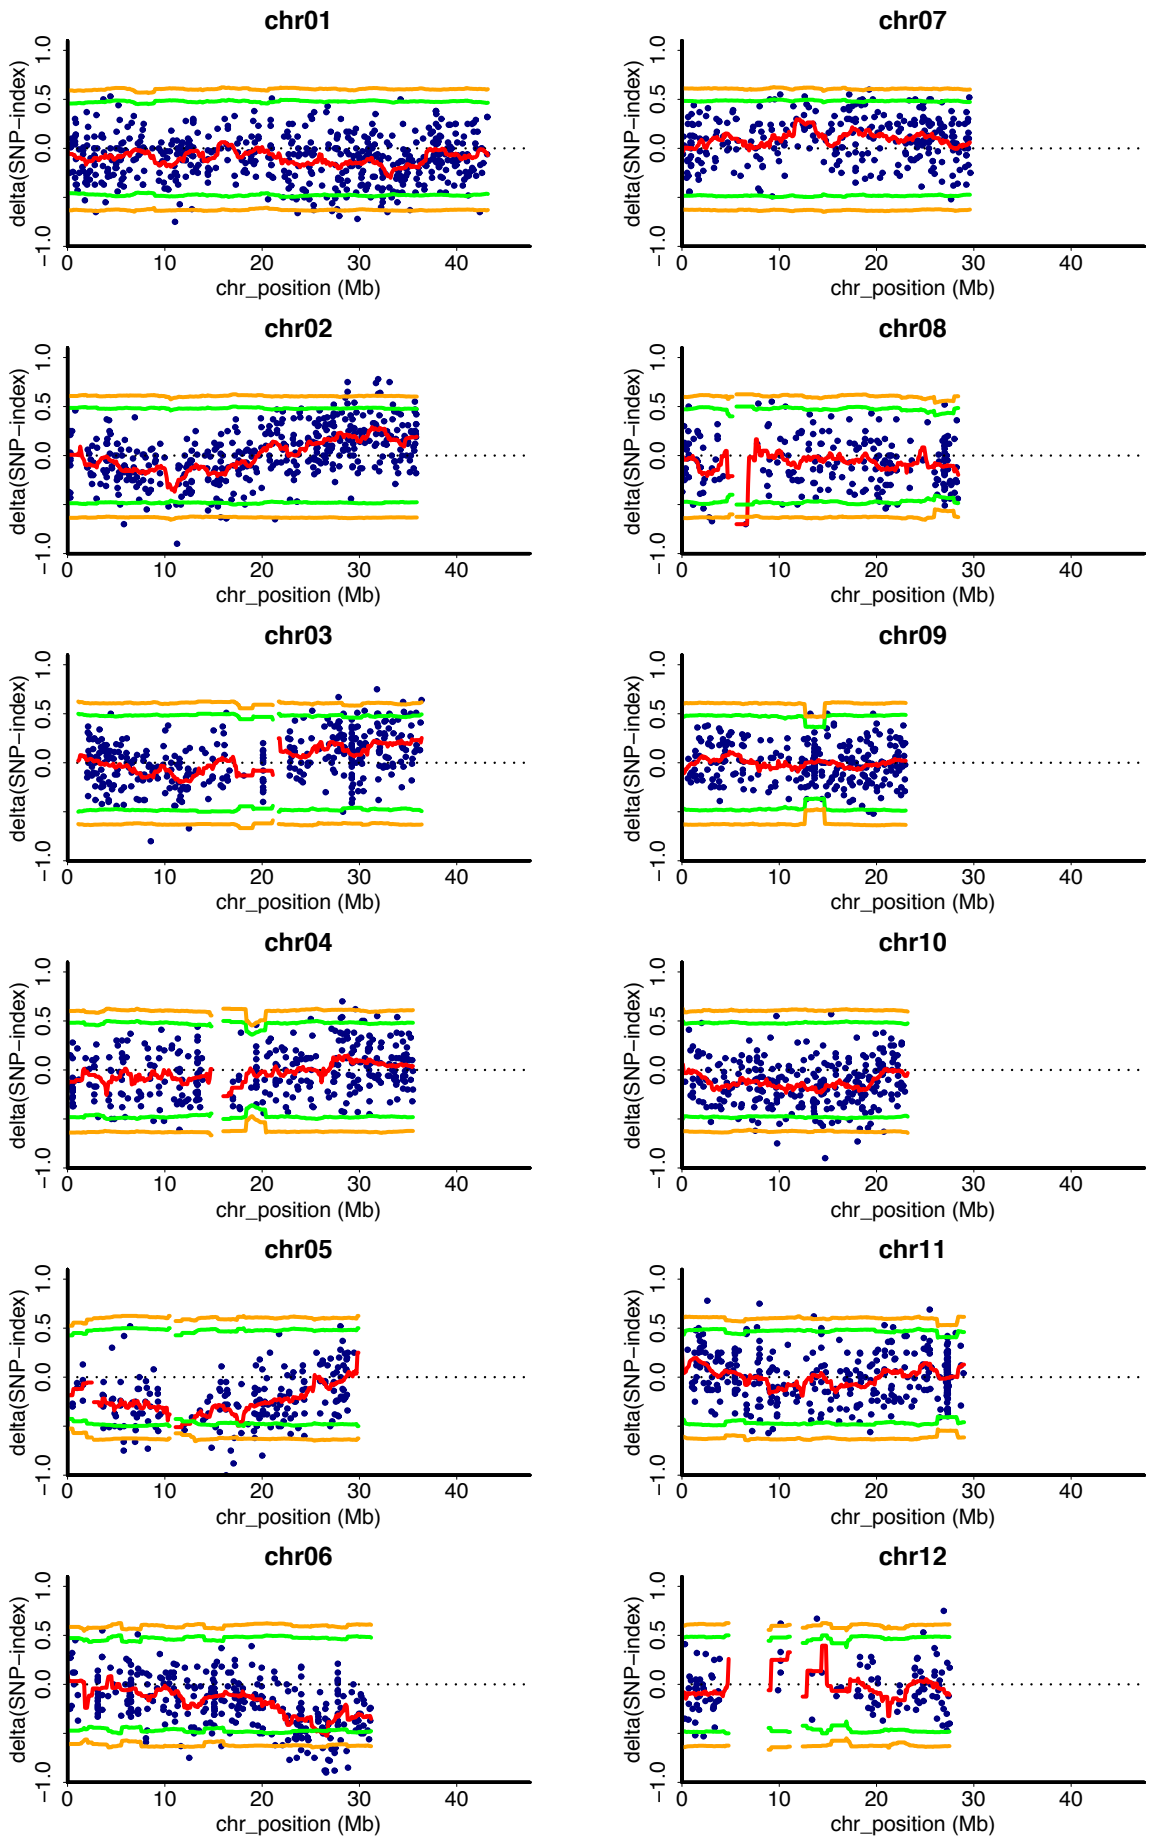

**Supplemental Figure S1 (G)** QTL-seq plot of F2 progeny from QTL-seq v1.4.5. The  $\Delta$ SNP-index plot obtained by subtraction of Highest-bulk SNP-index from Lowest-bulk SNP-index for F2 progeny obtained from a cross between Hitomebore and WRC57. Statistical confidence intervals under the null hypothesis of no QTL are shown (green:  $P < 0.05$ ; yellow:  $P < 0.01$ ).

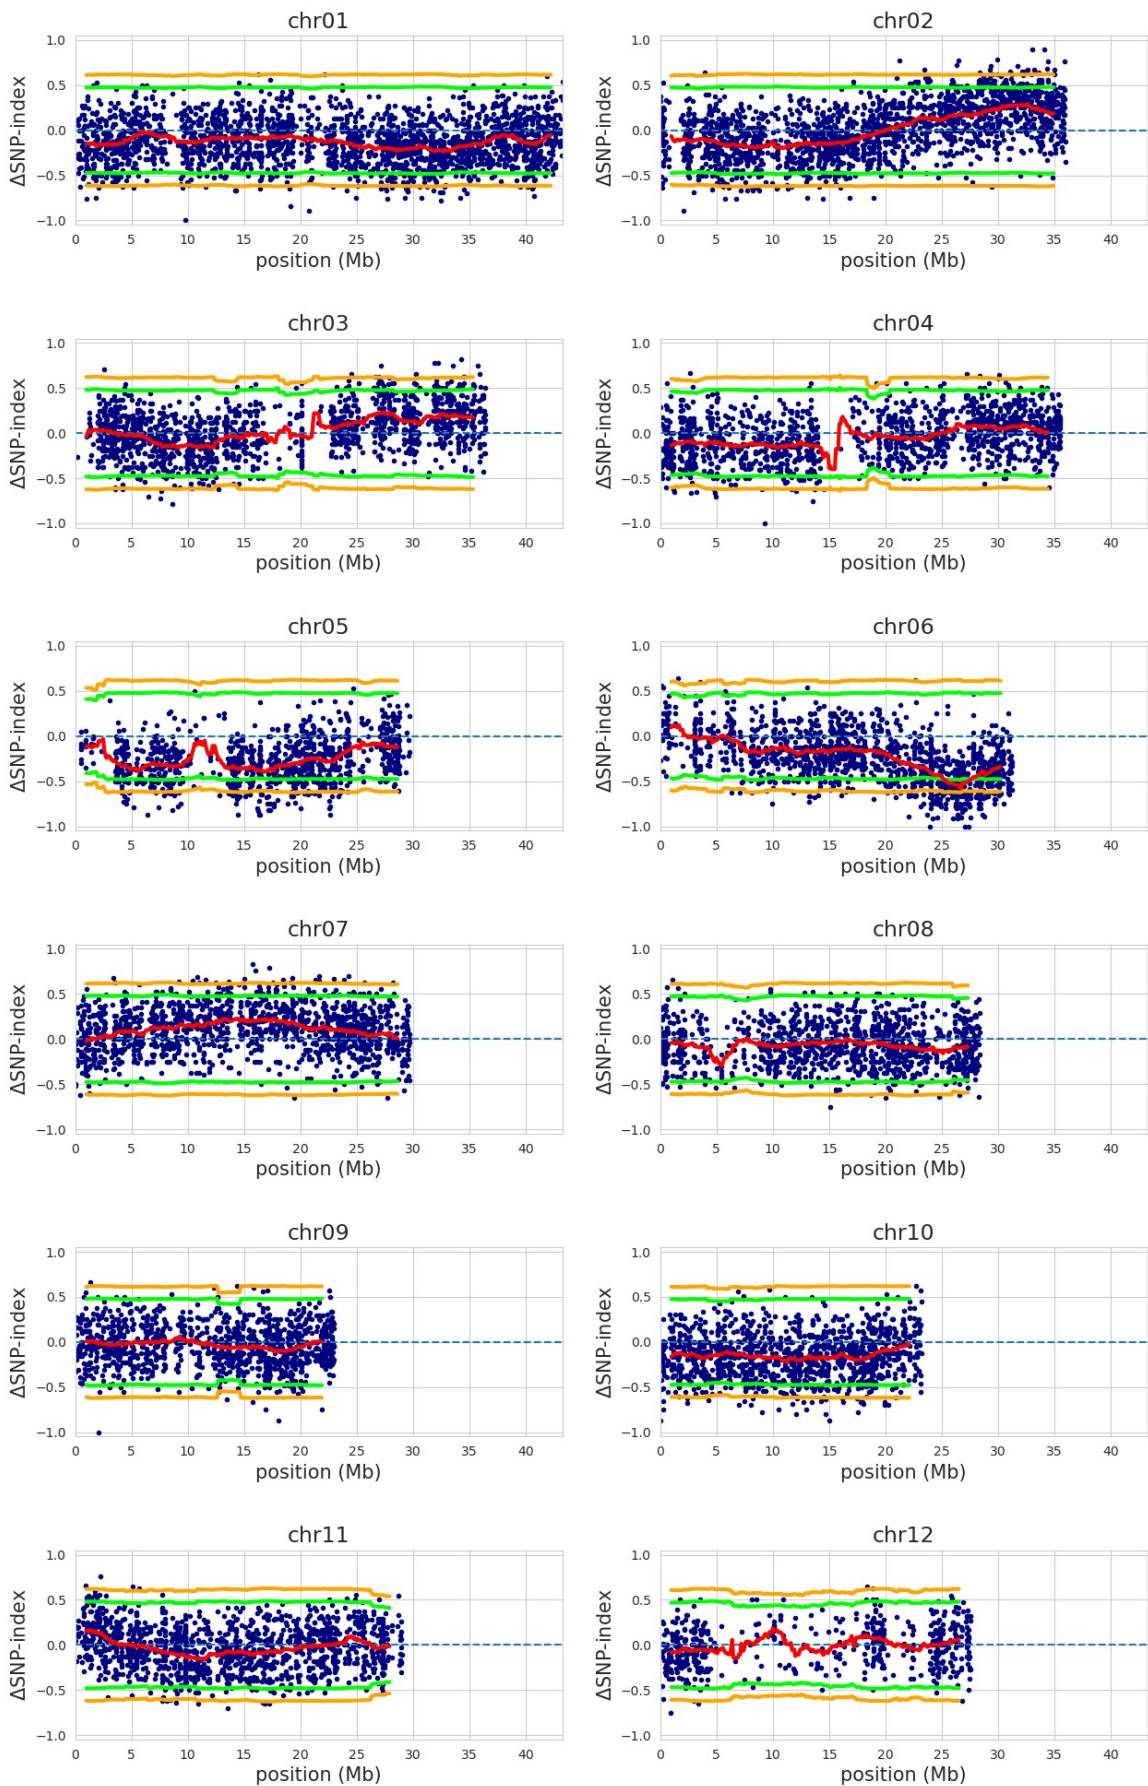

**Supplemental Figure S1 (H)** QTL-seq plot of F2 progeny from QTL-seq v2.2.2. The  $\Delta$ SNP-index plot obtained by subtraction of Highest-bulk SNP-index from Lowest-bulk SNP-index for F2 progeny obtained from a cross between Hitomebore and WRC57. Statistical confidence intervals under the null hypothesis of no QTL are shown (green:  $P < 0.05$ ; yellow:  $P < 0.01$ ).
